# Supplementary material
Source: Springer Nature journal article supplement (https://www.springermedizin.de/resource/supplementary/12936_2011_1904_MOESM4_ESM.pdf/9542050)
Supplement: MOESM4 [file 9542050]

**The standard unit selected is the full adult equivalent treatment dose (AETD), the number of milligrams of an anti-malarial drug needed to treat a 60 kg adult irrespective of the drug's original dosage form and presentation.**

Standard units are required in order to compare the price and volumes of the vast array of anti-malarials given the varied active ingredients, formulations and pack sizes. The dosage was determined by consulting WHO, peer reviewed and/or manufacturing guidelines, in that order.

The price per package was scaled to be equivalent to one full course, while the number of packages distributed (volumes) was scaled to the equivalent number of full courses sold in the previous week. For combination anti-malarials, one drug in the combination was selected for these calculations (e.g. the artesunate component of artesunate-amodiaquine).

Anti-malarial drugs mainly intended for prophylaxis and drug combinations not used to treat malaria but that contain an ingredient with anti-malarial action are excluded from analysis; however, in the case of a malaria prophylaxis which could be used for treatment in the absence of all other typical anti-malarials, these products were included in measures of anti-malarial availability.
